# Supplementary material for: Efficacy of interventions to increase physical activity for people with heart failure: a meta-analysis
Source: bioRxiv or medRxiv preprint supplement (doi:10.1101/2021.04.14.21255358), 2021-04-20
Supplement: Supplementary file [file media-5.pdf]

**Supplement 5.** Non-significant results: Intervention and participant characteristics, as well as method of assessment that do not contribute to intervention efficacy.

| Variable                                                     | SMD/b | CI, 95% (lower) | CI, 95% (upper) |
|--------------------------------------------------------------|-------|-----------------|-----------------|
| <b><i>Theory use:</i></b>                                    |       |                 |                 |
| Theory use score (overall, TCS)                              | 0.13  | -0.01           | 0.27            |
| Theory mentioned                                             | 0.46  | -0.23           | 1.15            |
| <b><i>Behaviour Change Techniques:*</i></b>                  |       |                 |                 |
| Self-monitoring of behavior                                  | 0.49  | -0.04           | 1.03            |
| Information about health consequences                        | 0.50  | -0.05           | 1.06            |
| Social support (emotional)                                   | 0.92  | -0.08           | 1.92            |
| Instruction on how to perform a behavior                     | 0.51  | -0.11           | 1.13            |
| Social support (unspecified)                                 | 0.53  | -0.19           | 1.25            |
| Demonstration of the behavior                                | 0.37  | -0.39           | 1.12            |
| Feedback on behavior                                         | 0.31  | -0.77           | 1.38            |
| Problem solving                                              | 0.05  | -0.92           | 1.02            |
| Monitoring outcome(s) of behavior by others without feedback | 0.32  | -0.92           | 1.56            |
| Behavioral contract                                          | 0.30  | -0.93           | 1.53            |
| Biofeedback                                                  | 0.50  | -1.01           | 2.01            |
| Review behavior goal(s)                                      | 0.18  | -1.08           | 1.43            |
| Reduce negative emotions                                     | 0.07  | -1.17           | 1.30            |
| Information about emotional consequences                     | 0.04  | -1.47           | 1.56            |
| Vicarious consequences                                       | 0.23  | -1.47           | 2.39            |
| Self-talk                                                    | 0.04  | -1.48           | 1.55            |
| Social comparison                                            | 0.02  | -1.55           | 1.60            |
| Behavioral experiments                                       | 0.21  | -1.93           | 2.34            |
| Distraction                                                  | 0.21  | -1.93           | 2.34            |
| Identification of self as role model                         | 0.21  | -1.93           | 2.34            |
| Reattribution                                                | 0.21  | -1.93           | 2.34            |
| Identity associated with changed behaviour                   | 0.23  | -1.93           | 2.39            |
| Non-specific incentive                                       | 0.23  | -1.93           | 2.39            |
| Restructuring the physical environment                       | 0.13  | -2.01           | 2.27            |
| Reduce prompts/cues                                          | 0.04  | -2.22           | 2.31            |
| Social support (practical)                                   | 1.42  | -2.22           | 2.46            |
| Discrepancy between current behavior and goal                | -0.14 | -2.28           | 2.01            |
| <b><i>Intervention intensity:</i></b>                        |       |                 |                 |
| Number of sessions                                           | 0.00  | -0.01           | 0.01            |

|                                                                            |       |       |      |
|----------------------------------------------------------------------------|-------|-------|------|
| Duration, single session (mins)                                            | 0.00  | 0.00  | 0.01 |
| Intervention contact time (mins)                                           | 0.00  | 0.00  | 0.00 |
| intervention duration (weeks)                                              | -0.01 | -0.04 | 0.02 |
| Individually delivered                                                     | 0.30  | -0.47 | 1.06 |
| <b>Setting:</b>                                                            |       |       |      |
| Home-setting                                                               | 0.16  | -0.66 | 0.99 |
| <b>Facilitator:</b>                                                        |       |       |      |
| Telehealth                                                                 | 0.73  | -0.79 | 2.25 |
| Nurse                                                                      | 0.34  | -0.38 | 1.05 |
| HF nurse                                                                   | 0.09  | -1.18 | 1.36 |
| Researcher                                                                 | 0.29  | -1.25 | 1.82 |
| Self-applied                                                               | 0.21  | -1.35 | 1.76 |
| Lay leader                                                                 | 0.21  | -1.93 | 2.34 |
| Advanced practice nurse                                                    | 0.23  | -1.93 | 2.39 |
| Cardiac nurse                                                              | 0.13  | -2.01 | 2.27 |
| Website                                                                    | 0.00  | -2.25 | 2.25 |
| Graduate student therapist (trained)                                       | -0.14 | -2.28 | 2.01 |
| <b>Participant characteristics:</b>                                        |       |       |      |
| Age                                                                        | 0.01  | 0.00  | 0.01 |
| Males included in the sample, (%)                                          | 0.01  | 0.00  | 0.02 |
| LVEF, (%)                                                                  | 0.01  | 0.00  | 0.02 |
| <b>Physical activity assessment:</b>                                       |       |       |      |
| Self-reports                                                               | 0.68  | -0.06 | 1.41 |
| Accelerometer                                                              | 0.31  | 0.07  | 0.56 |
| Difference in efficacy between trials using accelerometers vs self-reports | -0.32 | -1.15 | 0.51 |

\*(BCTTV1 taxonomy: Michie et al., 2013)
