# Supplementary material for: Efficacy of interventions to increase physical activity for people with heart failure: a meta-analysis
Source: bioRxiv or medRxiv preprint supplement (doi:10.1101/2021.04.14.21255358), 2021-04-20
Supplement: Supplementary file [file media-6.pdf]

**Supplement 6: The sensitivity analysis results.**

| EXCLUDED TRIALS                                                                                                                                       | Overall effect                                    | General Approach                                                                                                                                                                                                                                                                                                                 | Efficacious intervention characteristics                                                                                   |
|-------------------------------------------------------------------------------------------------------------------------------------------------------|---------------------------------------------------|----------------------------------------------------------------------------------------------------------------------------------------------------------------------------------------------------------------------------------------------------------------------------------------------------------------------------------|----------------------------------------------------------------------------------------------------------------------------|
| <p>Trials with the education comparator (Boyne et al. 2014; Meng et al. 2016; Freedland et al. 2015; Brodie and Inoue 2005) (Ajiboye et al. 2015)</p> | <p>SMD = 0.31,<br/>95%CI [0.21; 0.40]<br/>***</p> | <p><b>Exercise: SMD = 0.34 , 95%CI [0.18; 0.51];</b><br/><b>Remote communication and treatment: SMD = 0.42, 95%CI [0.24; 0.60];</b><br/>Exercise and behaviour change:<br/>SMD = 0.21, 95%CI [ 0.004; 0.41];<br/>Disease Management: SMD = 0.21, 95%CI [ -0.03; 0.45];<br/>Self-Management: SMD = 0.23, 95%CI [-0.17; 0.62].</p> | <p>No change in the significance of the effects associated with individual intervention or participant characteristics</p> |

| EXCLUDED TRIALS                                   | Overall effect                                   | General Approach                                                                                                                                                                                                                                                                                                                                                                                      | Efficacious intervention characteristics                                                                             |
|---------------------------------------------------|--------------------------------------------------|-------------------------------------------------------------------------------------------------------------------------------------------------------------------------------------------------------------------------------------------------------------------------------------------------------------------------------------------------------------------------------------------------------|----------------------------------------------------------------------------------------------------------------------|
| <p>HF-ACTION trial<br/>(O'Connor et al. 2009)</p> | <p>SMD = 0.37,<br/>95% CI: [0.10;<br/>0.63]*</p> | <p><b>Exercise: SMD = 0.56, 95% CI [0.18; 0.94];</b><br/><br/> Remote communication and treatment:<br/> SMD =0.41, 95% CI [-0.29; 1.11];<br/> MI: SMD = 0.03, 95% CI [-0.89; 0.94];<br/><br/> <b>Exercise and behaviour change:</b><br/> <b>SMD = 0.21, 95% CI [-0.59; 1.01];</b><br/><br/> CBT: SMD = 0.21, 95% CI [-0.91; 1.33];<br/><br/> Disease Management: SMD =0.23, 95% CI [-0.95; 1.41].</p> | <p>Behavioural Practice and Rehearsal *<br/><br/> Graded task *<br/><br/> Group-based *<br/><br/> Centre-based *</p> |

|                                                                                   |                                                                                                                                                                                                                                                                                                                                                                                           |                                                                                                                                                                                                                                                                                                                                                                                                                                                                                                                                                    |
|-----------------------------------------------------------------------------------|-------------------------------------------------------------------------------------------------------------------------------------------------------------------------------------------------------------------------------------------------------------------------------------------------------------------------------------------------------------------------------------------|----------------------------------------------------------------------------------------------------------------------------------------------------------------------------------------------------------------------------------------------------------------------------------------------------------------------------------------------------------------------------------------------------------------------------------------------------------------------------------------------------------------------------------------------------|
| <p>High Risk of Bias trials<br/>(Ajiboye et al. 2015;<br/>Tomita et al. 2008)</p> | <p>SMD = 0.4578 95%CI [0.0903 0.8252 *<br/>Exercise: SMD =0.36, 95%CI [-0.2; 0.91];<br/>Remote communication and treatment:<br/>SMD = 0.56, 95%CI [-0.57; 1.7];<br/>MI: SMD = 0.03, 95%CI [ -1.16; 1.21];<br/>Exercise and behaviour change:<br/>SMD = 1.27, 95%CI [0.47; 2.07]***;<br/>CBT: SMD = 0.21, 95%CI [ -1.38; 1.8];<br/>Disease Management: SMD =0.23, 95%CI [ -1.39 1.85].</p> | <p><b>Social Support (emotional) *</b><br/><b>Social Support (practical) **</b><br/><b>TCS score *</b><br/>Monitoring of behaviour by others w/o feedback*<br/>Credible source***<br/>Adding objects to the environment ***<br/>Self-monitoring of outcome(s) of behaviour*<br/><b>Self-monitoring of behaviour *</b><br/><b>Information about health consequences *</b><br/><b>Information on how to perform behaviour *</b><br/>Graded tasks *<br/>Action Planning *<br/>Goal setting (behaviour) *<br/>Behavioural Practice and Rehearsal**</p> |
|-----------------------------------------------------------------------------------|-------------------------------------------------------------------------------------------------------------------------------------------------------------------------------------------------------------------------------------------------------------------------------------------------------------------------------------------------------------------------------------------|----------------------------------------------------------------------------------------------------------------------------------------------------------------------------------------------------------------------------------------------------------------------------------------------------------------------------------------------------------------------------------------------------------------------------------------------------------------------------------------------------------------------------------------------------|

| EXCLUDED TRIALS                                                              | Overall effect                              | General Approach                                                                                                                                                                                                                                                                                                                                              | Efficacious intervention characteristics                                                                                                                                                                                                                                                                                                                                                                 |
|------------------------------------------------------------------------------|---------------------------------------------|---------------------------------------------------------------------------------------------------------------------------------------------------------------------------------------------------------------------------------------------------------------------------------------------------------------------------------------------------------------|----------------------------------------------------------------------------------------------------------------------------------------------------------------------------------------------------------------------------------------------------------------------------------------------------------------------------------------------------------------------------------------------------------|
| HF-ACTION trial<br>(O'Connor et al. 2009)<br>and High Risk of Bias<br>trials | SMD = 0.2670<br>95%CI [0.1549<br>0.3790 *** | <b>Exercise: SMD=0.35, 95% CI [0.15; 0.54]*;</b><br><b>Remote communication and treatment:</b><br><b>SMD=0.47, 95%CI [0.24;0.70]*;</b><br>MI: SMD=0.03, 95%CI [-0.46;0.52];<br><b>Exercise and behaviour change:</b><br><b>SMD= 0.21; 95%CI:[-0.07; 0.49];</b><br>CBT SMD= 0.21, 95%CI:[-0.15; 0.57]<br>Disease Management SMD= 0.23, 95%CI:[-0.25;<br>0.71]. | <b>Nurse ***</b><br><b>Telehealth**</b><br><b>Biological Feedback*</b><br>Credible source *<br>Self-monitoring of outcomes of<br>behaviour*<br><b>Self-monitoring of behaviour **</b><br><b>Demonstration of the behaviour **</b><br><b>Information about health consequences</b><br>**<br>Graded tasks **<br>Action Planning **<br>Goal setting (behaviour)***<br>Behavioural Practice and Rehearsal*** |

Note: \*p<0.05; \*\*p<0.01, \*\*\* p<0.001. The changes in the findings, identified by the sensitivity analysis (corresponding exclusion of the trials) are in bold.
