# Supplementary material for: Efficacy of interventions to increase physical activity for people with heart failure: a meta-analysis
Source: bioRxiv or medRxiv preprint supplement (doi:10.1101/2021.04.14.21255358), 2021-04-20

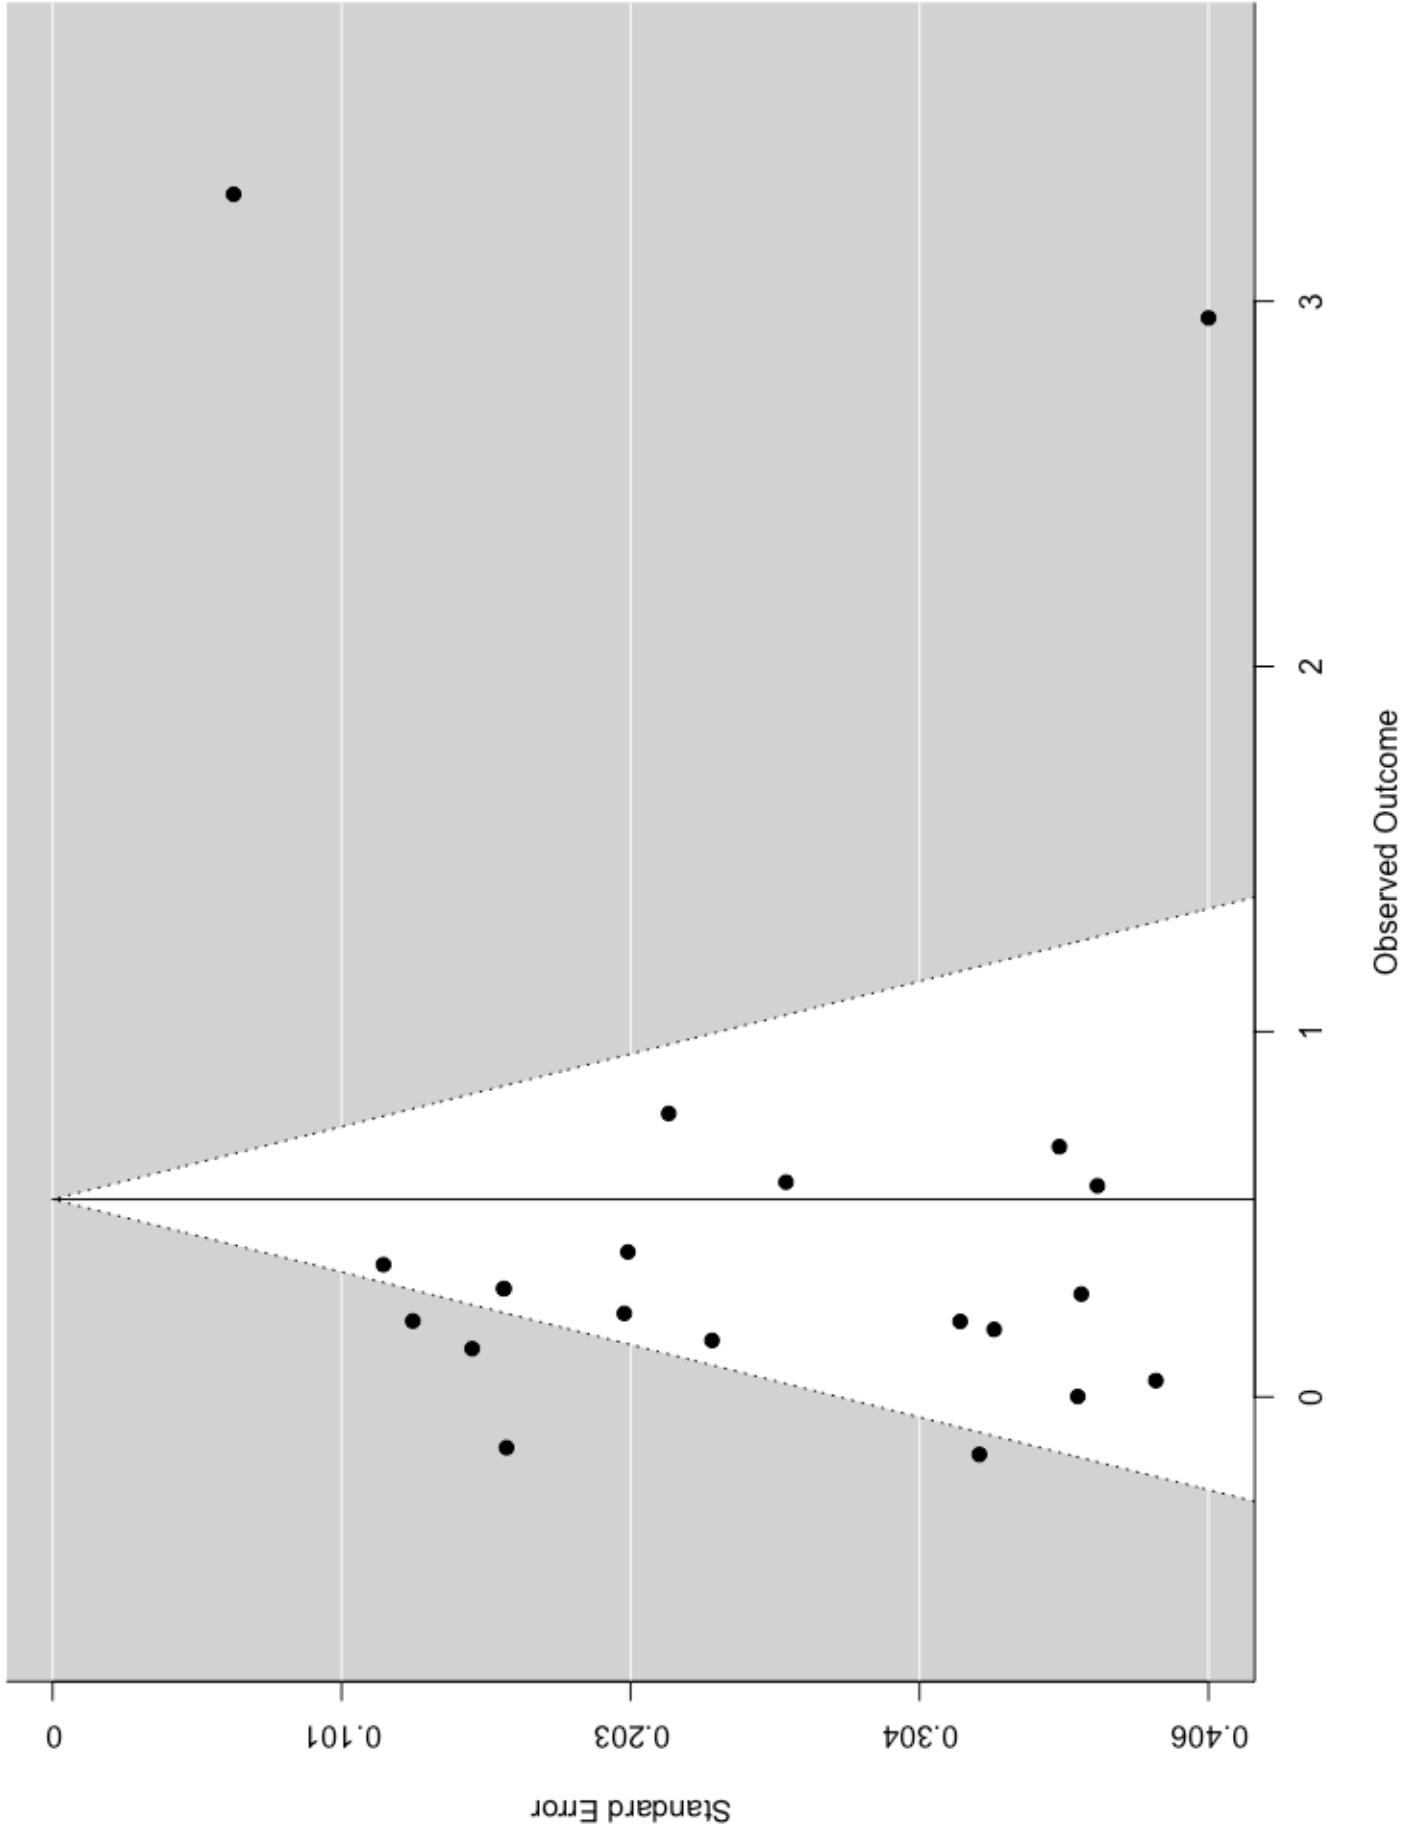

Supplement: Supplementary file [file media-7.pdf]
